# Supplementary material for: Elucidation of HHEX in pancreatic endoderm differentiation using a human iPSC differentiation model
Source: PubMed Central journal article supplement (PMC10227077; doi:10.1038/s41598-023-35875-1), 2023-05-29

## Supplementary Information

### **Elucidation of HHEX in pancreatic endoderm differentiation using a human iPSC differentiation model**

Ryo Ito<sup>1, 2</sup>, Azuma Kimura<sup>1</sup>, Yurie Hirose<sup>1</sup>, Yu Hatano<sup>1</sup>, Atsushi Mima<sup>1</sup>, Shin-Ichi Mae<sup>1</sup>, Yamato Keidai<sup>2</sup>, Toshihiro Nakamura<sup>2</sup>, Junji Fujikura<sup>2</sup>, Yohei Nishi<sup>1</sup>, Akira Ohta<sup>1</sup>, Taro Toyoda<sup>1\*</sup>, Nobuya Inagaki<sup>2</sup>, Kenji Osafune<sup>1\*</sup>

1. Center for iPS Cell Research and Application (CiRA), Kyoto University, 53 Kawahara-cho, Shogoin, Sakyo-ku, Kyoto, 606-8507, Japan.

2. Department of Diabetes, Endocrinology and Nutrition, Graduate School of Medicine, Kyoto University, 54 Kawahara-cho, Shogoin, Sakyo-ku, Kyoto, 606-8507, Japan.

\*Correspondence should be addressed to T.T. (e-mail address: [t.toyoda@cira.kyoto-u.ac.jp](mailto:t.toyoda@cira.kyoto-u.ac.jp), fax number: +81-75-366-7023) and K.O. (e-mail address: [osafu@cira.kyoto-u.ac.jp](mailto:osafu@cira.kyoto-u.ac.jp), fax number: +81-75-366-7077).

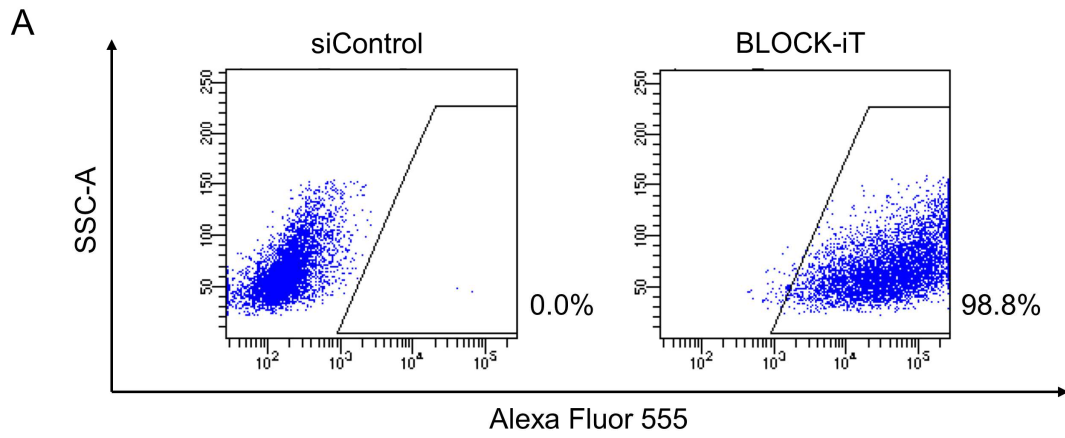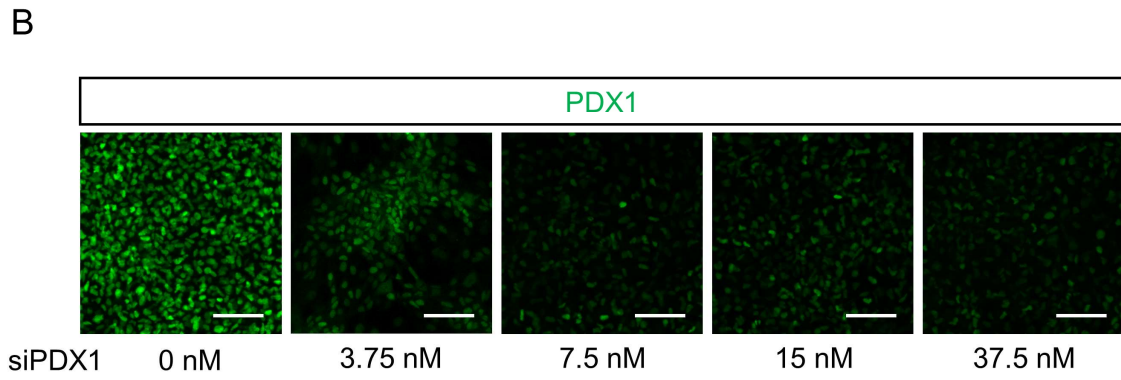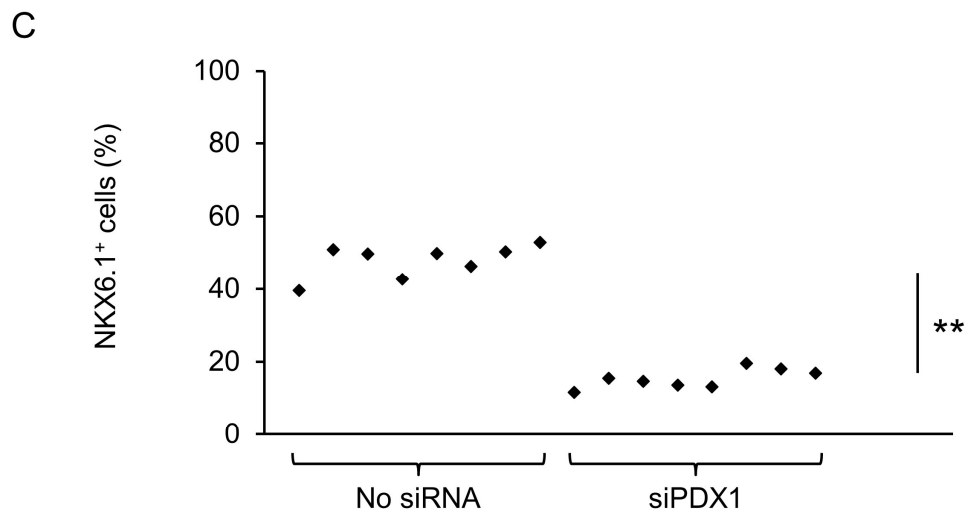

**Figure S1. siRNA knockdown screening system for regulators of NKX6.1 expression in pancreatic endoderm.**

(A) Representative flow cytometer plots showing the transfection efficiency of BLOCK-iT Alexa Fluor red fluorescent control into pancreatic endoderm cells. (B) Immunofluorescence images of pancreatic endoderm cells transfected with various concentrations of siPDX1 for PDX1. Scale bars, 100  $\mu\text{m}$ . (C) Scatterplot distribution of NKX6.1<sup>+</sup> cell percentage per well with or without PDX1 siRNA. \*\* $p < 0.01$ , two-tailed Student's t-test.

A

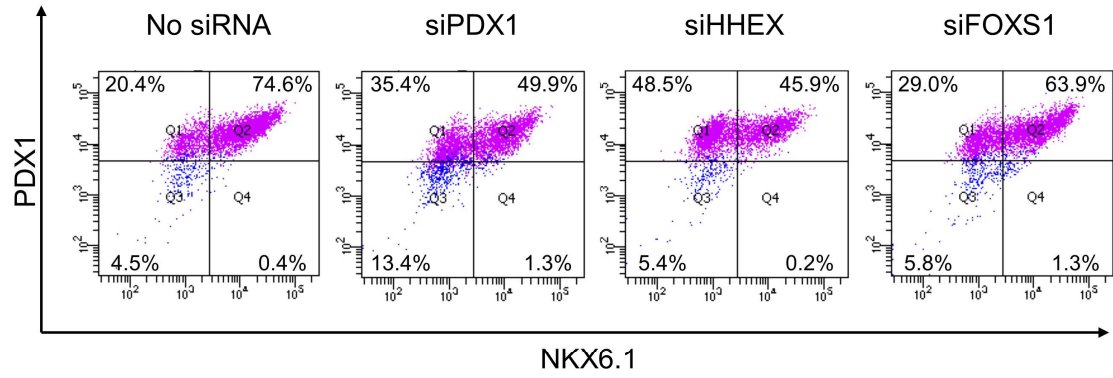

B

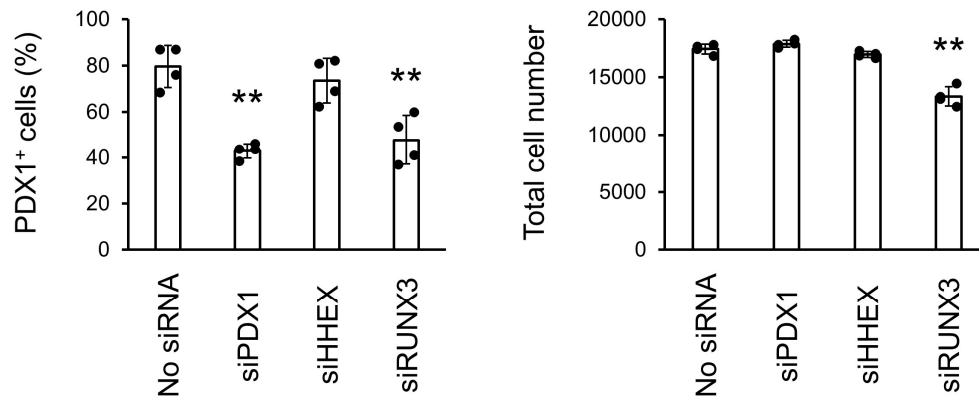

**Figure S2. Reproducibility of siRNA screening for regulators of NKX6.1 expression in pancreatic endoderm.**

(A) Representative flow cytometry dot plots and percentages of PDX1<sup>-</sup>NKX6.1<sup>-</sup>, PDX1<sup>+</sup>NKX6.1<sup>-</sup>, PDX1<sup>-</sup>NKX6.1<sup>+</sup> and PDX1<sup>+</sup>NKX6.1<sup>+</sup> cells upon knockdown of *PDX1*, *HHEX* or *FOXS1*. (B) Percentage of PDX1<sup>+</sup> cells (left panel) and total cell number (right panel) upon knockdown of *PDX1*, *HHEX* or *RUNX3* as evaluated by immunostaining image analysis. The data from four independent experiments are presented as the mean ± SD (n=4). \*\**p* < 0.01 by one-way ANOVA with Dunnett's test for comparison with no siRNA.

**A**

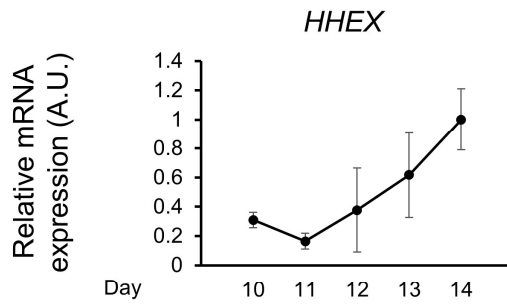

**B**

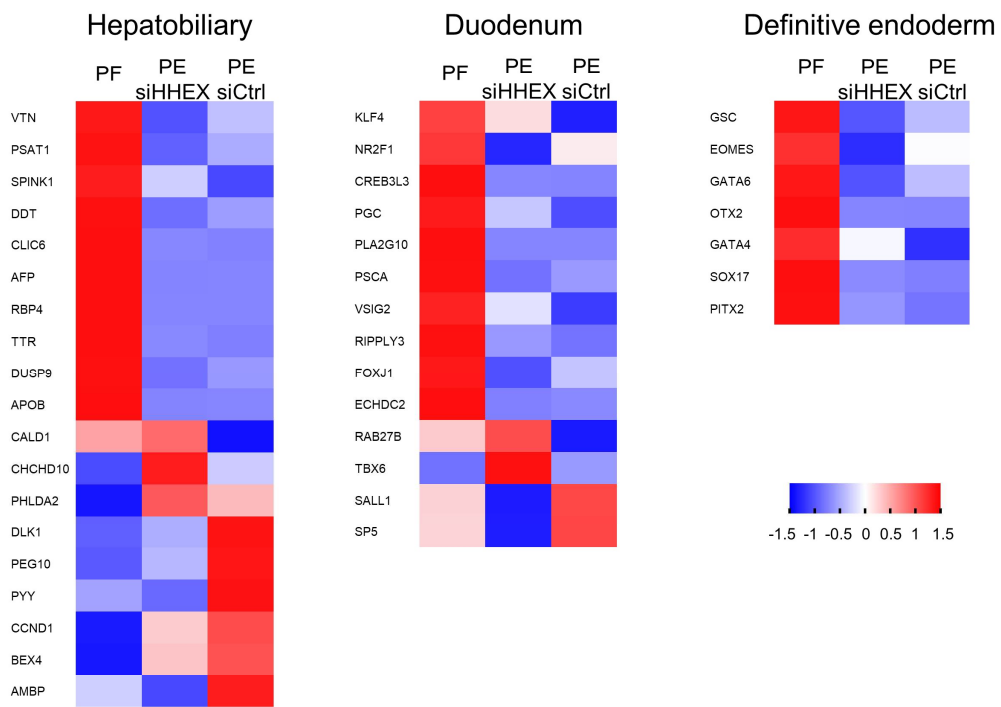

**C**

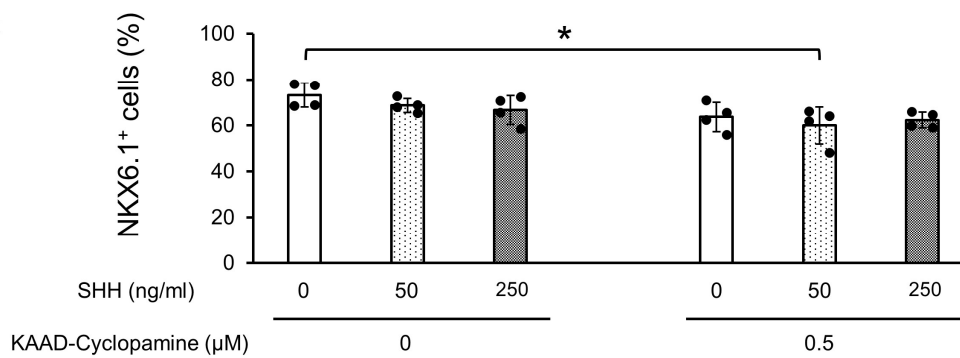

**Figure S3. Verification of HHEX in pancreatic endoderm differentiation.**

(A) *HHEX* expression during differentiation from posterior foregut to pancreatic endoderm using modified Stage 4 medium without EGF, nicotinamide or TPB. (B) Heatmaps representing normalized Z-scores of hepatobiliary, duodenum and definitive endoderm markers in posterior foregut (PF) and pancreatic endoderm (PE) with or without *HHEX* knockdown. (C) Percentage of NKX6.1<sup>+</sup> cells Stage 4 upon the addition of Sonic Hedgehog (SHH) and/or KAAD-Cyclopamine. The data from four independent experiments are presented as the mean  $\pm$  SD (n=4). \* $p < 0.05$  by one-way ANOVA with Tukey's test.

Full unedited membrane view for Figure 2B

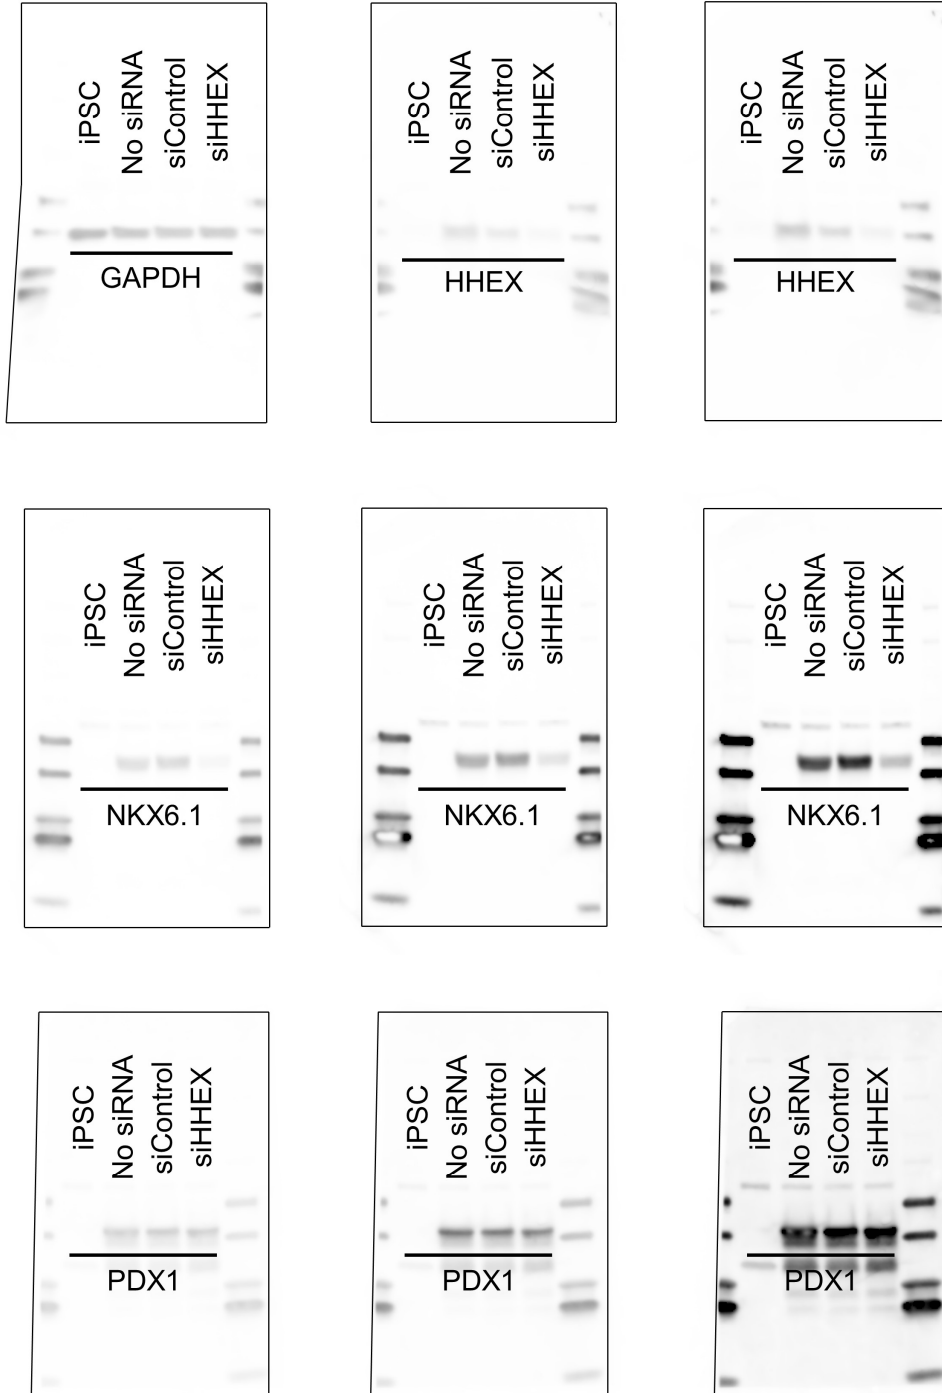

Supplement: 41598_2023_35875_MOESM1_ESM.pdf [file 41598_2023_35875_MOESM1_ESM.pdf]
